# Supplementary material for: Parameterization and Application of the General Amber Force Field to Model Fluoro Substituted Furanose Moieties and Nucleosides
Source: MDPI journal article supplement (doi:10.3390/molecules27092616), 2022-04-19
Supplement: s1 [file s1]

*Supplemental Information*

# **Parameterization and Application of the General Amber Force Field to Model Fluoro Substituted Furanose Moieties and Nucleosides**

**Diego E. Escalante <sup>1</sup>, Courtney C. Aldrich <sup>1</sup> and David M. Ferguson <sup>1,2,\*</sup>**

<sup>1</sup> Department of Medicinal Chemistry, University of Minnesota, Minneapolis, MN 55455, USA; escal005@umn.edu (D.E.E.); aldri015@umn.edu (C.C.A.)

<sup>2</sup> Center for Drug Design, University of Minnesota, Minneapolis, MN 55455, USA

\* Correspondence: ferguson@umn.edu

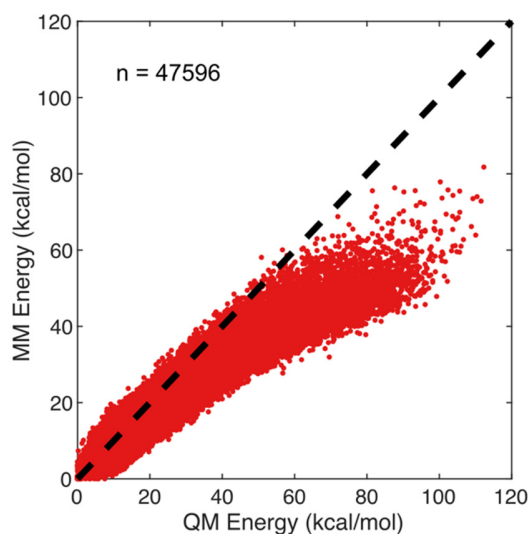

**Figure S1.** Comparison of total energy between AM1-BCC+*gaff* molecular mechanics (MM) and quantum mechanics (QM) calculations. The total MM energy was calculated using the standard *gaff* force field parameters. The total QM energy was calculated at the MP2 level using the cc-PvDZ basis set. The total sample included 47,596 structures, i.e. an average 1983 structures per configuration (1–24). The black dashed line indicates a 1:1 linear relationship between the two data sets.

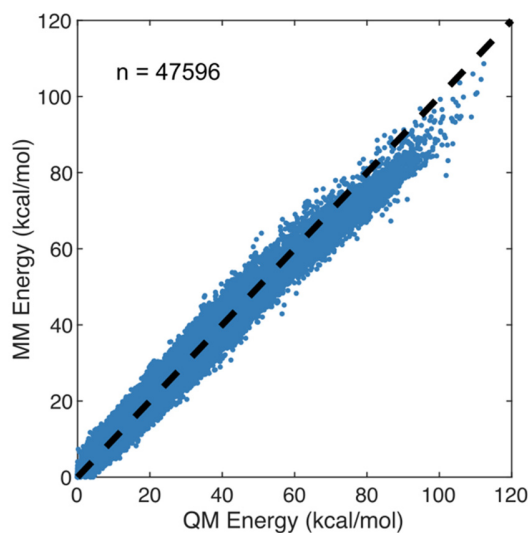

**Figure S2.** Comparison of total energy between IPolQ+*sugar\_mod* molecular mechanics (MM) and quantum mechanics (QM) calculations. The total MM energy was calculated using the fitted parameters calculated by *mdgx*, referred to as the *sugar\_mod* force field parameters. The total QM energy was calculated at the MP2 level using the cc-PvDZ basis set. The total sample included 47,596 structures, i.e. an average 1983 structures per configuration (1–24). The black dashed line indicates a 1:1 linear relationship between the two data sets.

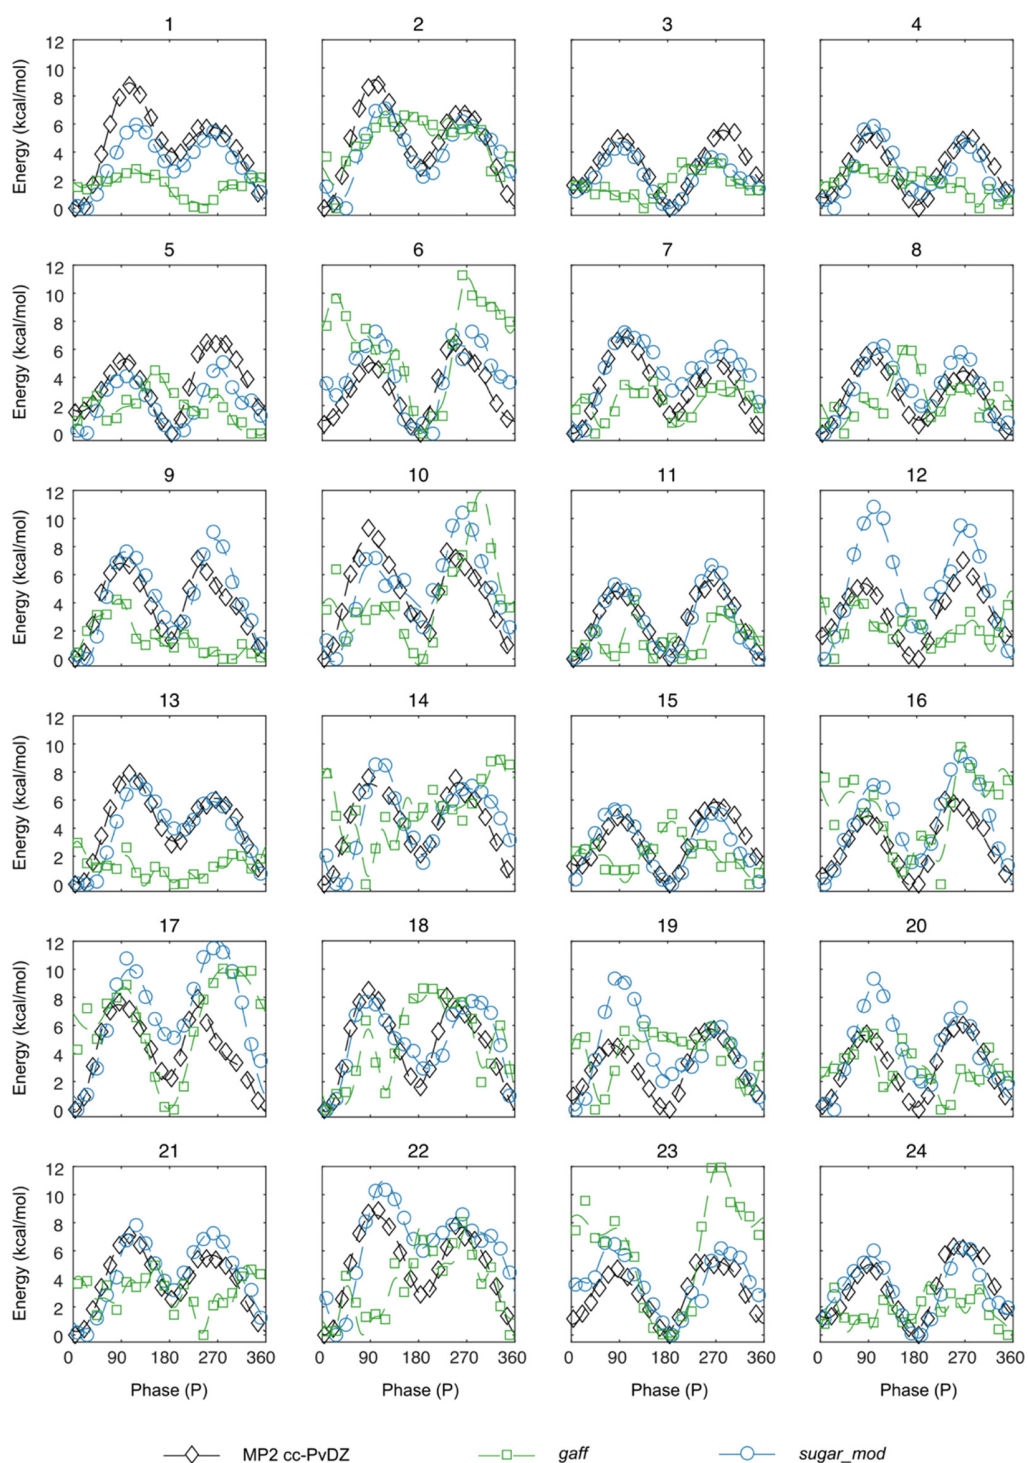

**Figure S3.** Energy profiles with sugar heavy atoms frozen at different puckering phase angles (P). Quantum mechanical energies were calculated at the MP2 level using the cc-PvDZ basis set and are shown as black diamonds. The molecular mechanical energies shown in this figure represent the statistical average for each P value during a 20 ns simulation (i.e. a total simulation time of 400 ns for each test structure). The results for the *gaff* and *sugar\_mod* force fields are shown as green squares and blue circles, respectively.

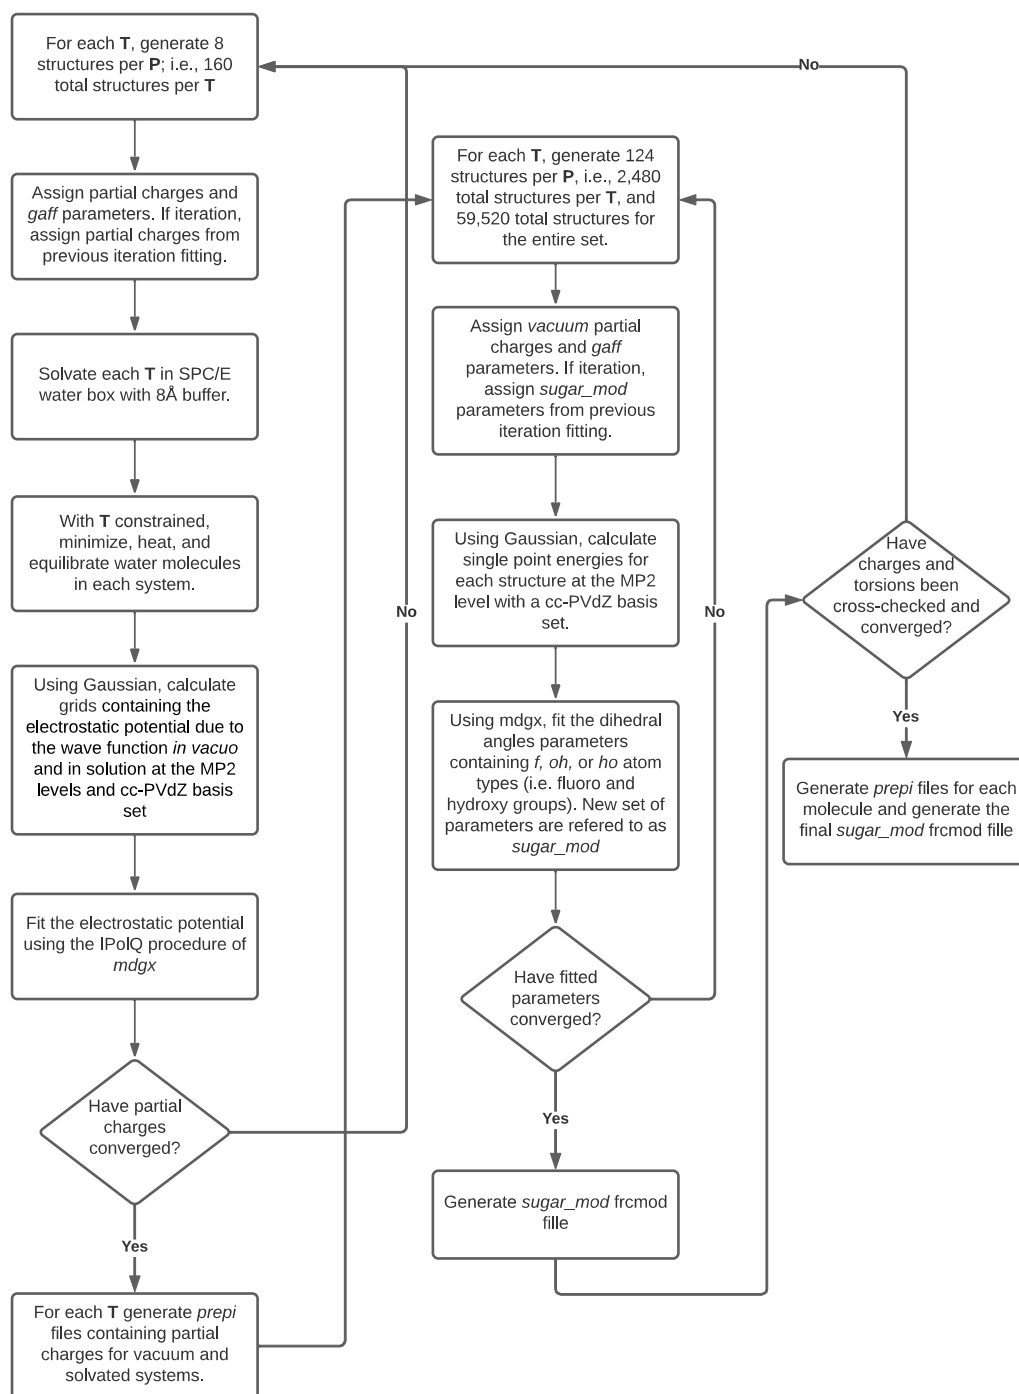

**Figure S4.** Partial charge calculation and torsion angle reparameterization workflow. (*left*) Workflow used to calculate implicitly polarized and gas-phase partial charge sets for *each* molecule, and, (*right*) workflow used to generate the *sugar\_mod* frmod file containing the reparameterization of  $V_n$  and  $\gamma$  for the dihedrals of interest.

**Table S1.** List of all torsions identified by the *parmchk2* utility.

| Torsion parameters |             |             |             |
|--------------------|-------------|-------------|-------------|
| c3-c3-c3-c3        | cc-cd-nd-cc | h1-c3-c3-na | h4-cc-na-cc |
| c3-c3-c3-f         | cd-cc-na-c3 | h1-c3-c3-oh | h4-cd-nd-cc |
| c3-c3-c3-h1        | cd-cc-na-cc | h1-c3-c3-os | h5-cc-na-c3 |
| c3-c3-c3-h2        | f-c3-c3-f   | h1-c3-n3-c3 | h5-cc-na-cc |
| c3-c3-c3-hc        | f-c3-c3-h1  | h1-c3-n3-hn | h5-cc-nd-cd |
| c3-c3-c3-n3        | f-c3-c3-h2  | h1-c3-oh-ho | hc-c3-c3-na |
| c3-c3-c3-na        | f-c3-c3-hc  | h1-c3-os-c3 | hc-c3-c3-oh |
| c3-c3-c3-oh        | f-c3-c3-na  | h2-c3-c3-hc | hc-c3-c3-os |
| c3-c3-c3-os        | f-c3-c3-oh  | h2-c3-c3-oh | n3-c3-c3-os |
| c3-c3-n3-c3        | f-c3-c3-os  | h2-c3-na-cc | na-c3-c3-oh |
| c3-c3-n3-hn        | h1-c3-c3-h1 | h2-c3-os-c3 | na-c3-os-c3 |
| c3-c3-na-cc        | h1-c3-c3-h2 | h4-cc-cd-h4 | na-cc-cd-h4 |
| c3-c3-oh-ho        | h1-c3-c3-hc | h4-cc-cd-nd | na-cc-cd-nd |
| c3-c3-os-c3        | h1-c3-c3-n3 | h4-cc-na-c3 | na-cc-nd-cd |
| nd-cc-na-cc        | oh-c3-c3-oh | oh-c3-c3-os | nd-cc-na-c3 |
| os-c3-na-cc        |             |             |             |

**Table S2.** List of all angles identified by the *parmchk2* utility.

| Angle parameters |          |          |
|------------------|----------|----------|
| c3-c3-c3         | c3-oh-ho | h1-c3-os |
| c3-c3-f          | c3-os-c3 | h2-c3-na |
| c3-c3-h1         | cc-cd-h4 | h2-c3-os |
| c3-c3-h2         | cc-cd-nd | h4-cc-na |
| c3-c3-hc         | cc-na-cc | h4-cd-nd |
| c3-c3-n3         | cc-nd-cd | h5-cc-na |
| c3-c3-na         | cd-cc-h4 | h5-cc-nd |
| c3-c3-oh         | cd-cc-na | hc-c3-hc |
| c3-c3-os         | f-c3-h1  | na-c3-os |
| c3-n3-c3         | h1-c3-h1 | na-cc-nd |
| c3-n3-hn         | h1-c3-n3 | h1-c3-oh |
| c3-na-cc         |          |          |

**Table S3.** Refined set of torsional parameters used to calculate the potential energy of mono, di-, and gem-fluorinated nucleosides in combination with the AMBER General Force Field (*gaff*). For further information on term usage refer to Section 14.1.4 of the AMBER 18 user manual.

| Dihedral Definition | Divider | Barrier term<br>( $V_n$ ) | Phase ( $\gamma$ ) | Periodicity ( $n$ ) |
|---------------------|---------|---------------------------|--------------------|---------------------|
| c3-c3-c3-os         | 1       | 0.070                     | 180.000            | -3.000              |
| c3-c3-c3-os         | 1       | 0.031                     | 180.000            | -2.000              |
| c3-c3-c3-os         | 1       | 0.008                     | 180.000            | 1.000               |
| h1-c3-c3-os         | 1       | 0.237                     | 180.000            | -3.000              |
| h1-c3-c3-os         | 1       | 0.427                     | 180.000            | -2.000              |
| h1-c3-c3-os         | 1       | 0.042                     | 0.000              | 1.000               |
| c3-c3-c3-c3         | 1       | 0.148                     | 180.000            | -3.000              |
| c3-c3-c3-c3         | 1       | 0.137                     | 0.000              | -2.000              |
| c3-c3-c3-c3         | 1       | 0.159                     | 180.000            | 1.000               |
| c3-c3-c3-hc         | 1       | 0.449                     | 0.000              | -3.000              |
| c3-c3-c3-hc         | 1       | 0.679                     | 180.000            | -2.000              |
| c3-c3-c3-hc         | 1       | 0.598                     | 180.000            | 1.000               |
| c3-c3-os-c3         | 1       | 0.145                     | 180.000            | -3.000              |
| c3-c3-os-c3         | 1       | 0.298                     | 0.000              | -2.000              |
| c3-c3-os-c3         | 1       | 0.212                     | 0.000              | 1.000               |
| c3-c3-c3-h1         | 1       | 0.648                     | 0.000              | -3.000              |
| c3-c3-c3-h1         | 1       | 0.434                     | 180.000            | -2.000              |
| c3-c3-c3-h1         | 1       | 0.397                     | 0.000              | 1.000               |
| h1-c3-c3-h1         | 1       | 0.393                     | 0.000              | -3.000              |
| h1-c3-c3-h1         | 1       | 0.150                     | 180.000            | -2.000              |
| h1-c3-c3-h1         | 1       | 0.414                     | 180.000            | 1.000               |
| h2-c3-os-c3         | 1       | 0.307                     | 0.000              | -3.000              |
| h2-c3-os-c3         | 1       | 0.347                     | 180.000            | -2.000              |
| h2-c3-os-c3         | 1       | 0.108                     | 0.000              | 1.000               |
| na-c3-os-c3         | 1       | 0.461                     | 180.000            | -3.000              |
| na-c3-os-c3         | 1       | 0.248                     | 0.000              | -2.000              |
| na-c3-os-c3         | 1       | 0.058                     | 180.000            | 1.000               |
| c3-c3-c3-h2         | 1       | 0.842                     | 180.000            | -3.000              |
| c3-c3-c3-h2         | 1       | 0.651                     | 0.000              | -2.000              |
| c3-c3-c3-h2         | 1       | 0.215                     | 180.000            | 1.000               |
| c3-c3-c3-na         | 1       | 0.667                     | 180.000            | -3.000              |
| c3-c3-c3-na         | 1       | 0.127                     | 0.000              | -2.000              |
| c3-c3-c3-na         | 1       | 0.104                     | 0.000              | 1.000               |
| hc-c3-c3-os         | 1       | 0.100                     | 0.000              | -3.000              |
| hc-c3-c3-os         | 1       | 0.032                     | 0.000              | -2.000              |
| hc-c3-c3-os         | 1       | 0.945                     | 180.000            | 1.000               |
| h2-c3-c3-hc         | 1       | 0.153                     | 180.000            | -3.000              |
| h2-c3-c3-hc         | 1       | 0.603                     | 0.000              | -2.000              |
| h2-c3-c3-hc         | 1       | 0.644                     | 0.000              | 1.000               |
| hc-c3-c3-na         | 1       | 0.742                     | 0.000              | -3.000              |

|             |   |       |         |        |
|-------------|---|-------|---------|--------|
| hc-c3-c3-na | 1 | 0.675 | 0.000   | -2.000 |
| hc-c3-c3-na | 1 | 2.274 | 0.000   | 1.000  |
| h1-c3-c3-hc | 1 | 0.320 | 0.000   | -3.000 |
| h1-c3-c3-hc | 1 | 0.291 | 180.000 | -2.000 |
| h1-c3-c3-hc | 1 | 1.364 | 0.000   | 1.000  |
| h1-c3-os-c3 | 1 | 0.031 | 180.000 | -3.000 |
| h1-c3-os-c3 | 1 | 0.050 | 0.000   | -2.000 |
| h1-c3-os-c3 | 1 | 0.083 | 180.000 | 1.000  |
| c3-c3-c3-f  | 1 | 0.280 | 180.000 | -3.000 |
| c3-c3-c3-f  | 1 | 0.521 | 0.000   | -2.000 |
| c3-c3-c3-f  | 1 | 1.821 | 180.000 | 1.000  |
| f-c3-c3-h1  | 1 | 0.936 | 0.000   | -3.000 |
| f-c3-c3-h1  | 1 | 0.616 | 180.000 | -2.000 |
| f-c3-c3-h1  | 1 | 1.237 | 0.000   | 1.000  |
| f-c3-c3-f   | 1 | 0.634 | 180.000 | -3.000 |
| f-c3-c3-f   | 1 | 1.502 | 0.000   | -2.000 |
| f-c3-c3-f   | 1 | 3.450 | 180.000 | 1.000  |
| f-c3-c3-os  | 1 | 0.174 | 0.000   | -3.000 |
| f-c3-c3-os  | 1 | 0.800 | 0.000   | -2.000 |
| f-c3-c3-os  | 1 | 0.655 | 180.000 | 1.000  |
| f-c3-c3-h2  | 1 | 0.134 | 180.000 | -3.000 |
| f-c3-c3-h2  | 1 | 0.837 | 0.000   | -2.000 |
| f-c3-c3-h2  | 1 | 0.357 | 180.000 | 1.000  |
| f-c3-c3-na  | 1 | 0.552 | 180.000 | -3.000 |
| f-c3-c3-na  | 1 | 0.003 | 0.000   | -2.000 |
| f-c3-c3-na  | 1 | 0.199 | 0.000   | 1.000  |
| h1-c3-c3-h2 | 1 | 1.598 | 0.000   | -3.000 |
| h1-c3-c3-h2 | 1 | 0.089 | 0.000   | -2.000 |
| h1-c3-c3-h2 | 1 | 0.080 | 0.000   | 1.000  |
| h1-c3-c3-na | 1 | 1.801 | 0.000   | -3.000 |
| h1-c3-c3-na | 1 | 0.597 | 180.000 | -2.000 |
| h1-c3-c3-na | 1 | 0.762 | 0.000   | 1.000  |
| c3-c3-c3-oh | 1 | 0.051 | 180.000 | -3.000 |
| c3-c3-c3-oh | 1 | 0.732 | 0.000   | -2.000 |
| c3-c3-c3-oh | 1 | 1.871 | 180.000 | 1.000  |
| c3-c3-oh-ho | 1 | 0.190 | 0.000   | -3.000 |
| c3-c3-oh-ho | 1 | 1.535 | 0.000   | -2.000 |
| c3-c3-oh-ho | 1 | 3.043 | 0.000   | 1.000  |
| h1-c3-c3-oh | 1 | 0.938 | 0.000   | -3.000 |
| h1-c3-c3-oh | 1 | 0.346 | 180.000 | -2.000 |
| h1-c3-c3-oh | 1 | 1.109 | 0.000   | 1.000  |
| f-c3-c3-oh  | 1 | 0.825 | 180.000 | -3.000 |
| f-c3-c3-oh  | 1 | 1.170 | 0.000   | -2.000 |
| f-c3-c3-oh  | 1 | 3.564 | 180.000 | 1.000  |
| oh-c3-c3-os | 1 | 0.108 | 0.000   | -3.000 |
| oh-c3-c3-os | 1 | 0.715 | 0.000   | -2.000 |
| oh-c3-c3-os | 1 | 0.543 | 180.000 | 1.000  |
| h1-c3-oh-ho | 1 | 0.001 | 0.000   | -3.000 |

|             |   |       |         |        |
|-------------|---|-------|---------|--------|
| h1-c3-oh-ho | 1 | 1.079 | 0.000   | -2.000 |
| h1-c3-oh-ho | 1 | 2.921 | 0.000   | 1.000  |
| h2-c3-c3-oh | 1 | 0.212 | 180.000 | -3.000 |
| h2-c3-c3-oh | 1 | 0.553 | 0.000   | -2.000 |
| h2-c3-c3-oh | 1 | 0.094 | 0.000   | 1.000  |
| na-c3-c3-oh | 1 | 0.080 | 180.000 | -3.000 |
| na-c3-c3-oh | 1 | 0.398 | 180.000 | -2.000 |
| na-c3-c3-oh | 1 | 0.152 | 0.000   | 1.000  |
| oh-c3-c3-oh | 1 | 0.983 | 180.000 | -3.000 |
| oh-c3-c3-oh | 1 | 0.985 | 0.000   | -2.000 |
| oh-c3-c3-oh | 1 | 3.435 | 180.000 | 1.000  |
| f-c3-c3-hc  | 1 | 0.047 | 180.000 | -3.000 |
| f-c3-c3-hc  | 1 | 0.002 | 0.000   | -2.000 |
| f-c3-c3-hc  | 1 | 0.723 | 180.000 | 1.000  |
| hc-c3-c3-oh | 1 | 0.074 | 180.000 | -3.000 |
| hc-c3-c3-oh | 1 | 0.086 | 0.000   | -2.000 |
| hc-c3-c3-oh | 1 | 1.331 | 180.000 | 1.00   |

---



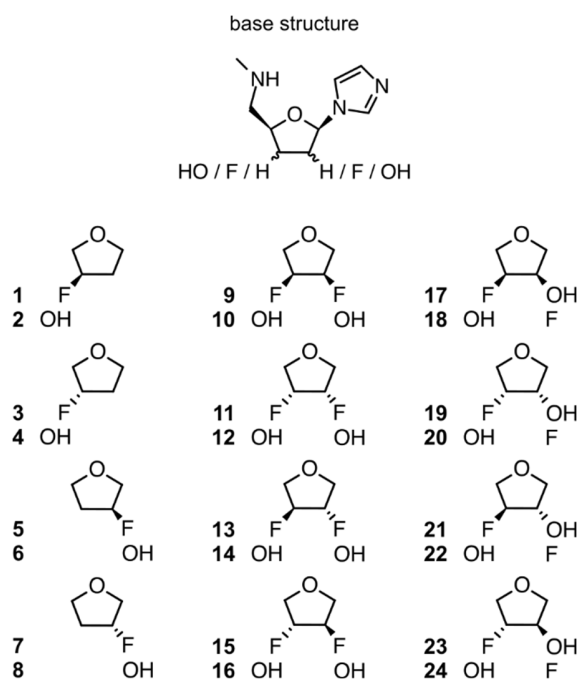

**Figure S5.** Set of 24 test furanose ring structures used to derive partial charges and parameterize torsional variables. Numbers in bold indicate the index number assigned to each molecule. The prepi files in **Tables S4–S27** correspond to each of the molecules **1–24**.

**Table S4.** prepi file for test molecule 1.

```

0      0      2

prepi file for test molecule 1
molecule.res
d01 INT 0
CORRECT OMIT DU BEG
0.0000
1 DUMM DU M 0 -1 -2 0.000 .0 .0 .00000
2 DUMM DU M 1 0 -1 1.449 .0 .0 .00000
3 DUMM DU M 2 1 0 1.523 111.21 .0 .00000
4 C14 c3 M 3 2 1 1.540 111.208 -180.000 -0.059720
5 H26 h1 E 4 3 2 1.090 0.000 -90.000 0.067110
6 H27 h1 E 4 3 2 1.090 109.453 -120.008 0.069920
7 H28 h1 E 4 3 2 1.090 109.453 120.008 0.068200
8 N1 n3 M 4 3 2 1.460 109.490 0.000 -0.582000
9 H15 hn E 8 4 3 1.010 109.505 -59.943 0.307350
10 C2 c3 M 8 4 3 1.460 109.490 180.000 0.021310
11 H16 h1 E 10 8 4 1.090 109.453 59.992 0.066210
12 H17 h1 E 10 8 4 1.090 109.453 -59.992 0.070510
13 C3 c3 M 10 8 4 1.500 109.474 -180.000 0.145660
14 O7 os E 13 10 8 1.436 109.705 59.998 -0.414020
15 H18 h1 E 13 10 8 1.092 107.677 -60.925 0.037450
16 C4 c3 M 13 10 8 1.535 111.369 175.869 0.246920
17 F13 f E 16 13 10 1.337 107.684 3.503 -0.240910
18 H19 h1 E 16 13 10 1.091 114.687 122.533 0.045800
19 C5 c3 M 16 13 10 1.514 103.695 -111.946 -0.288320
20 H20 hc E 19 16 13 1.090 113.314 -151.801 0.095210
21 H21 hc E 19 16 13 1.091 110.440 87.060 0.117190
22 C6 c3 M 19 16 13 1.522 102.231 -30.070 0.421640
23 H22 h2 E 22 19 16 1.093 112.129 -75.233 0.028740
24 N8 na M 22 19 16 1.460 112.802 162.332 -0.080480
25 C9 cc M 24 22 19 1.370 127.533 -82.906 -0.279550
26 H23 h4 E 25 24 22 1.084 122.222 -0.013 0.189140
27 C10 cd M 25 24 22 1.386 104.733 179.986 0.082870
28 H24 h4 E 27 25 24 1.085 126.008 -179.997 0.114310
29 N11 nd M 27 25 24 1.325 111.679 -0.029 -0.529920
30 C12 cc M 29 27 25 1.313 105.418 0.040 0.178380
31 H25 h5 E 30 29 27 1.085 127.386 -179.959 0.101000

LOOP
C6 07
C12 N8

IMPROPER
C6 C9 N8 C12
C10 H23 C9 N8
C9 H24 C10 N11
H25 N8 C12 N11

DONE
STOP

```

**Table S5.** prepi file for test molecule 2.

```

0      0      2

prepi file for test molecule 2
molecule.res
d02 INT 0
CORRECT OMIT DU BEG
0.0000
1 DUMM DU M 0 -1 -2 0.000 .0 .0 .00000
2 DUMM DU M 1 0 -1 1.449 .0 .0 .00000
3 DUMM DU M 2 1 0 1.523 111.21 .0 .00000
4 C14 c3 M 3 2 1 1.540 111.208 -180.000 0.029800
5 H26 h1 E 4 3 2 1.090 0.000 -90.000 0.033120
6 H27 h1 E 4 3 2 1.090 109.453 -120.008 0.042920
7 H28 h1 E 4 3 2 1.090 109.453 120.008 0.051250
8 N1 n3 M 4 3 2 1.460 109.490 0.000 -0.599120
9 H15 hn E 8 4 3 1.010 109.505 -59.943 0.327820
10 C2 c3 M 8 4 3 1.460 109.490 180.000 -0.047330
11 H16 h1 E 10 8 4 1.090 109.453 59.992 0.096770
12 H17 h1 E 10 8 4 1.090 109.453 -59.992 0.101000
13 C3 c3 M 10 8 4 1.500 109.474 -180.000 0.061960
14 O7 os E 13 10 8 1.436 109.705 59.998 -0.385660
15 H18 h1 E 13 10 8 1.092 107.677 -60.925 0.082480
16 C4 c3 M 13 10 8 1.535 111.369 175.869 0.152500
17 O13 oh S 16 13 10 1.410 107.655 3.504 -0.571350
18 H29 ho E 17 16 13 0.960 109.479 179.980 0.411670
19 H19 h1 E 16 13 10 1.091 114.687 122.533 0.042430
20 C5 c3 M 16 13 10 1.514 103.695 -111.946 -0.201770
21 H20 hc E 20 16 13 1.090 113.314 -151.801 0.088400
22 H21 hc E 20 16 13 1.091 110.440 87.060 0.082640
23 C6 c3 M 20 16 13 1.522 102.231 -30.070 0.406100
24 H22 h2 E 23 20 16 1.093 112.129 -75.233 0.015160
25 N8 na M 23 20 16 1.460 112.802 162.332 -0.105320
26 C9 cc M 25 23 20 1.370 127.533 -82.906 -0.261560
27 H23 h4 E 26 25 23 1.084 122.222 -0.013 0.179170
28 C10 cd M 26 25 23 1.386 104.733 179.986 0.102290
29 H24 h4 E 28 26 25 1.085 126.008 -179.997 0.108860
30 N11 nd M 28 26 25 1.325 111.679 -0.029 -0.551220
31 C12 cc M 30 28 26 1.313 105.418 0.040 0.210030
32 H25 h5 E 31 30 28 1.085 127.386 -179.959 0.096960

LOOP
C6 07
C12 N8

IMPROPER
C6 C9 N8 C12
C10 H23 C9 N8
C9 H24 C10 N11
H25 N8 C12 N11

DONE
STOP

```

**Table S6.** prepi file for test molecule 3.

```

0      0      2

prepi file for test molecule 3
molecule.res
d03 INT 0
CORRECT OMIT DU BEG
0.0000
1 DUMM DU M 0 -1 -2 0.000 .0 .0 .00000
2 DUMM DU M 1 0 -1 1.449 .0 .0 .00000
3 DUMM DU M 2 1 0 1.523 111.21 .0 .00000
4 C14 c3 M 3 2 1 1.540 111.208 -180.000 -0.001620
5 H26 h1 E 4 3 2 1.090 0.000 -90.000 0.053650
6 H27 h1 E 4 3 2 1.090 109.453 -120.008 0.056200
7 H28 h1 E 4 3 2 1.090 109.453 120.008 0.053020
8 N1 n3 M 4 3 2 1.460 109.490 0.000 -0.584370
9 H15 hn E 8 4 3 1.010 109.505 -59.943 0.307680
10 C2 c3 M 8 4 3 1.460 109.490 180.000 -0.038050
11 H16 h1 E 10 8 4 1.090 109.453 59.992 0.064850
12 H17 h1 E 10 8 4 1.090 109.453 -59.992 0.089220
13 C3 c3 M 10 8 4 1.500 109.474 -180.000 0.190380
14 O7 os E 13 10 8 1.436 109.705 59.998 -0.422880
15 H18 h1 E 13 10 8 1.092 107.677 -60.925 0.026740
16 C4 c3 M 13 10 8 1.535 111.369 175.869 0.313400
17 F13 f E 16 13 10 1.336 109.044 133.530 -0.262980
18 H19 h1 E 16 13 10 1.091 114.423 13.693 0.006730
19 C5 c3 M 16 13 10 1.514 103.695 -111.946 -0.247740
20 H20 hc E 19 16 13 1.090 113.314 -151.801 0.089600
21 H21 hc E 19 16 13 1.091 110.440 87.060 0.083980
22 C6 c3 M 19 16 13 1.522 102.231 -30.070 0.440730
23 H22 h2 E 22 19 16 1.093 112.129 -75.233 0.020050
24 N8 na M 22 19 16 1.460 112.802 162.332 -0.083030
25 C9 cc M 24 22 19 1.370 127.533 -82.906 -0.262890
26 H23 h4 E 25 24 22 1.084 122.222 -0.013 0.180270
27 C10 cd M 25 24 22 1.386 104.733 179.986 0.085770
28 H24 h4 E 27 25 24 1.085 126.008 -179.997 0.112030
29 N11 nd M 27 25 24 1.325 111.679 -0.029 -0.514460
30 C12 cc M 29 27 25 1.313 105.418 0.040 0.129610
31 H25 h5 E 30 29 27 1.085 127.386 -179.959 0.114110

LOOP
C6 07
C12 N8

IMPROPER
C6 C9 N8 C12
C10 H23 C9 N8
C9 H24 C10 N11
H25 N8 C12 N11

DONE
STOP

```

Table S7. prepi file for test molecule 4.

```

0      0      2

prepi file for test molecule 4
molecule.res
d04 INT 0
CORRECT OMIT DU BEG
0.0000
1 DUMM DU M 0 -1 -2 0.000 .0 .0 .00000
2 DUMM DU M 1 0 -1 1.449 .0 .0 .00000
3 DUMM DU M 2 1 0 1.523 111.21 .0 .00000
4 C14 c3 M 3 2 1 1.540 111.208 -180.000 -0.003800
5 H26 h1 E 4 3 2 1.090 0.000 -90.000 0.051110
6 H27 h1 E 4 3 2 1.090 109.453 -120.008 0.051230
7 H28 h1 E 4 3 2 1.090 109.453 120.008 0.056200
8 N1 n3 M 4 3 2 1.460 109.490 0.000 -0.597760
9 H15 hn E 8 4 3 1.010 109.505 -59.943 0.318570
10 C2 c3 M 8 4 3 1.460 109.490 180.000 0.003160
11 H16 h1 E 10 8 4 1.090 109.453 59.992 0.067250
12 H17 h1 E 10 8 4 1.090 109.453 -59.992 0.076520
13 C3 c3 M 10 8 4 1.500 109.474 -180.000 0.096560
14 07 os E 13 10 8 1.436 109.705 59.998 -0.388990
15 H18 h1 E 13 10 8 1.092 107.677 -60.925 0.060870
16 C4 c3 M 13 10 8 1.535 111.369 175.869 0.276130
17 013 oh S 16 13 10 1.410 109.046 133.545 -0.593130
18 H29 ho E 17 16 13 0.960 109.464 -179.983 0.384260
19 H19 h1 E 16 13 10 1.091 114.423 13.693 0.029090
20 C5 c3 M 16 13 10 1.514 103.695 -111.946 -0.293970
21 H20 hc E 20 16 13 1.090 113.314 -151.801 0.117380
22 H21 hc E 20 16 13 1.091 110.440 87.060 0.100010
23 C6 c3 M 20 16 13 1.522 102.231 -30.070 0.377460
24 H22 h2 E 23 20 16 1.093 112.129 -75.233 0.064320
25 N8 na M 23 20 16 1.460 112.802 162.332 -0.174620
26 C9 cc M 25 23 20 1.370 127.533 -82.906 -0.195560
27 H23 h4 E 26 25 23 1.084 122.222 -0.013 0.168050
28 C10 cd M 26 25 23 1.386 104.733 179.986 0.046580
29 H24 h4 E 28 26 25 1.085 126.008 -179.997 0.126610
30 N11 nd M 28 26 25 1.325 111.679 -0.029 -0.540060
31 C12 cc M 30 28 26 1.313 105.418 0.040 0.227060
32 H25 h5 E 31 30 28 1.085 127.386 -179.959 0.089470

LOOP
C6 07
C12 N8

IMPROPER
C6 C9 N8 C12
C10 H23 C9 N8
C9 H24 C10 N11
H25 N8 C12 N11

DONE
STOP

```

Table S8. prepi file for test molecule 5.

```

0      0      2

prepi file for test molecule 5
molecule.res
d05 INT 0
CORRECT OMIT DU BEG
0.0000
1 DUMM DU M 0 -1 -2 0.000 .0 .0 .00000
2 DUMM DU M 1 0 -1 1.449 .0 .0 .00000
3 DUMM DU M 2 1 0 1.523 111.21 .0 .00000
4 C14 c3 M 3 2 1 1.540 111.208 -180.000 0.000690
5 H26 h1 E 4 3 2 1.090 0.000 -90.000 0.047740
6 H27 h1 E 4 3 2 1.090 109.453 -120.008 0.054090
7 H28 h1 E 4 3 2 1.090 109.453 120.008 0.057240
8 N1 n3 M 4 3 2 1.460 109.490 0.000 -0.559020
9 H15 hn E 8 4 3 1.010 109.505 -59.943 0.301920
10 C2 c3 M 8 4 3 1.460 109.490 180.000 -0.120720
11 H16 h1 E 10 8 4 1.090 109.453 59.992 0.094110
12 H17 h1 E 10 8 4 1.090 109.453 -59.992 0.095470
13 C3 c3 M 10 8 4 1.500 109.474 -180.000 0.296790
14 07 os E 13 10 8 1.436 109.705 59.998 -0.398950
15 H18 h1 E 13 10 8 1.092 107.677 -60.925 0.009810
16 C4 c3 M 13 10 8 1.535 111.369 175.869 -0.223790
17 H13 hc E 16 13 10 1.089 109.031 133.558 0.086620
18 H19 hc E 16 13 10 1.091 114.423 13.693 0.089910
19 C5 c3 M 16 13 10 1.514 103.695 -111.946 0.223760
20 H20 h1 E 19 16 13 1.090 113.314 -151.801 0.039120
21 F21 f E 19 16 13 1.380 110.438 87.062 -0.228620
22 C6 c3 M 19 16 13 1.522 102.231 -30.070 0.275220
23 H22 h2 E 22 19 16 1.093 112.129 -75.233 0.045070
24 N8 na M 22 19 16 1.460 112.802 162.332 -0.006340
25 C9 cc M 24 22 19 1.370 127.533 -82.906 -0.306800
26 H23 h4 E 25 24 22 1.084 122.222 -0.013 0.196860
27 C10 cd M 25 24 22 1.386 104.733 179.986 0.108590
28 H24 h4 E 27 25 24 1.085 126.008 -179.997 0.105940
29 N11 nd M 27 25 24 1.325 111.679 -0.029 -0.514060
30 C12 cc M 29 27 25 1.313 105.418 0.040 0.104700
31 H25 h5 E 30 29 27 1.085 127.386 -179.959 0.124650

LOOP
C6 07
C12 N8

IMPROPER
C6 C9 N8 C12
C10 H23 C9 N8
C9 H24 C10 N11
H25 N8 C12 N11

DONE
STOP

```

Table S9. prepi file for test molecule 6.

```

0      0      2

prepi file for test molecule 6
molecule.res
d06 INT 0
CORRECT OMIT DU BEG
0.0000
1 DUMM DU M 0 -1 -2 0.000 .0 .0 .00000
2 DUMM DU M 1 0 -1 1.449 .0 .0 .00000
3 DUMM DU M 2 1 0 1.523 111.21 .0 .00000
4 C14 c3 M 3 2 1 1.540 111.208 -180.000 0.082490
5 H26 h1 E 4 3 2 1.090 0.000 -90.000 0.033300
6 H27 h1 E 4 3 2 1.090 109.453 -120.008 0.029700
7 H28 h1 E 4 3 2 1.090 109.453 120.008 0.026080
8 N1 n3 M 4 3 2 1.460 109.490 0.000 -0.575440
9 H15 hn E 8 4 3 1.010 109.505 -59.943 0.292980
10 C2 c3 M 8 4 3 1.460 109.490 180.000 -0.039400
11 H16 h1 E 10 8 4 1.090 109.453 59.992 0.077120
12 H17 h1 E 10 8 4 1.090 109.453 -59.992 0.068370
13 C3 c3 M 10 8 4 1.500 109.474 -180.000 0.267620
14 07 os E 13 10 8 1.436 109.705 59.998 -0.413300
15 H18 h1 E 13 10 8 1.092 107.677 -60.925 0.022150
16 C4 c3 M 13 10 8 1.535 111.369 175.869 -0.245860
17 H13 hc E 16 13 10 1.089 109.031 133.558 0.079630
18 H19 hc E 16 13 10 1.091 114.423 13.693 0.100490
19 C5 c3 M 16 13 10 1.514 103.695 -111.946 0.222730
20 H20 h1 E 19 16 13 1.090 113.314 -151.801 0.038140
21 021 oh S 19 16 13 1.410 110.427 87.045 -0.556130
22 H29 ho E 21 19 16 0.961 109.504 179.965 0.370290
23 C6 c3 M 19 16 13 1.522 102.231 -30.070 0.264220
24 H22 h2 E 23 19 16 1.093 112.129 -75.233 0.029630
25 N8 na M 23 19 16 1.460 112.802 162.332 0.012620
26 C9 cc M 25 23 19 1.370 127.533 -82.906 -0.269770
27 H23 h4 E 26 25 23 1.084 122.222 -0.013 0.173310
28 C10 cd M 26 25 23 1.386 104.733 179.986 0.098300
29 H24 h4 E 28 26 25 1.085 126.008 -179.997 0.110690
30 N11 nd M 28 26 25 1.325 111.679 -0.029 -0.539750
31 C12 cc M 30 28 26 1.313 105.418 0.040 0.116840
32 H25 h5 E 31 30 28 1.085 127.386 -179.959 0.122950

LOOP
C6 07
C12 N8

IMPROPER
C6 C9 N8 C12
C10 H23 C9 N8
C9 H24 C10 N11
H25 N8 C12 N11

DONE
STOP

```

Table S10. prepi file for test molecule 7.

```

0      0      2

prepi file for test molecule 7
molecule.res
d07 INT 0
CORRECT OMIT DU BEG
0.0000
1 DUMM DU M 0 -1 -2 0.000 .0 .0 .00000
2 DUMM DU M 1 0 -1 1.449 .0 .0 .00000
3 DUMM DU M 2 1 0 1.523 111.21 .0 .00000
4 C14 c3 M 3 2 1 1.540 111.208 -180.000 -0.023750
5 H26 h1 E 4 3 2 1.090 0.000 -90.000 0.052560
6 H27 h1 E 4 3 2 1.090 109.453 -120.008 0.061190
7 H28 h1 E 4 3 2 1.090 109.453 120.008 0.056410
8 N1 n3 M 4 3 2 1.460 109.490 0.000 -0.552590
9 H15 hn E 8 4 3 1.010 109.505 -59.943 0.296650
10 C2 c3 M 8 4 3 1.460 109.490 180.000 -0.056710
11 H16 h1 E 10 8 4 1.090 109.453 59.992 0.090270
12 H17 h1 E 10 8 4 1.090 109.453 -59.992 0.081820
13 C3 c3 M 10 8 4 1.500 109.474 -180.000 0.223060
14 07 os E 13 10 8 1.436 109.705 59.998 -0.383380
15 H18 h1 E 13 10 8 1.092 107.677 -60.925 0.044770
16 C4 c3 M 13 10 8 1.535 111.369 175.869 -0.266160
17 H13 hc E 16 13 10 1.089 109.031 133.558 0.107300
18 H19 hc E 16 13 10 1.091 114.423 13.693 0.096120
19 C5 c3 M 16 13 10 1.514 103.695 -111.946 0.302380
20 F20 f E 19 16 13 1.380 113.304 -151.791 -0.254260
21 H21 h1 E 19 16 13 1.091 110.440 87.060 0.036800
22 C6 c3 M 19 16 13 1.522 102.231 -30.070 0.155580
23 H22 h2 E 22 19 16 1.093 112.129 -75.233 0.100040
24 N8 na M 22 19 16 1.460 112.802 162.332 -0.041620
25 C9 cc M 24 22 19 1.370 127.533 -82.906 -0.248990
26 H23 h4 E 25 24 22 1.084 122.222 -0.013 0.182460
27 C10 cd M 25 24 22 1.386 104.733 179.986 0.078180
28 H24 h4 E 27 25 24 1.085 126.008 -179.997 0.115390
29 N11 nd M 27 25 24 1.325 111.679 -0.029 -0.538490
30 C12 cc M 29 27 25 1.313 105.418 0.040 0.180720
31 H25 h5 E 30 29 27 1.085 127.386 -179.959 0.104250

LOOP
C6 07
C12 N8

IMPROPER
C6 C9 N8 C12
C10 H23 C9 N8
C9 H24 C10 N11
H25 N8 C12 N11

DONE
STOP

```



Table S11. prepi file for test molecule 8.

```

0      0      2

prepi file for test molecule 8
molecule.res
d08      INT      0
CORRECT      OMIT DU      BEG
0.0000
1  DUMM DU      M      0 -1 -2      0.000      .0      .0      .00000
2  DUMM DU      M      1 0 -1      1.449      .0      .0      .00000
3  DUMM DU      M      2 1 0      1.523      111.21      .0      .00000
4  C14 c3      M      3 2 1      1.540      111.208      -180.000      -0.105950
5  H26 h1      E      4 3 2      1.090      0.000      -90.000      0.073600
6  H27 h1      E      4 3 2      1.090      109.453      -120.008      0.075820
7  H28 h1      E      4 3 2      1.090      109.453      120.008      0.083530
8  N1 n3      M      4 3 2      1.460      109.490      0.000      -0.526810
9  H15 hn      E      8 4 3      1.010      109.505      -59.943      0.298490
10 C2 c3      M      8 4 3      1.460      109.490      180.000      -0.100730
11 H16 h1      E     10 8 4      1.090      109.453      59.992      0.079520
12 H17 h1      E     10 8 4      1.090      109.453      -59.992      0.100770
13 C3 c3      M     10 8 4      1.500      109.474      -180.000      0.243640
14 07 os      E     13 10 8      1.436      109.705      59.998      -0.381000
15 H18 h1      E     13 10 8      1.092      107.677      -60.925      0.022250
16 C4 c3      M     13 10 8      1.535      111.369      175.869      -0.022490
17 H13 hc      E     16 13 10      1.089      109.031      133.558      0.038810
18 H19 hc      E     16 13 10      1.091      114.423      13.693      0.021700
19 C5 c3      M     16 13 10      1.514      103.695      -111.946      0.098240
20 020 oh      S     19 16 13      1.410      113.305      -151.801      -0.533350
21 H29 ho      E     20 19 16      0.961      109.496      179.992      0.370660
22 H21 h1      E     19 16 13      1.091      110.440      87.060      0.074320
23 C6 c3      M     19 16 13      1.522      102.231      -30.070      0.120960
24 H22 h2      E     23 19 16      1.093      112.129      -75.233      0.101230
25 N8 na      M     23 19 16      1.460      112.802      162.332      0.083640
26 C9 cc      M     25 23 19      1.370      127.533      -82.906      -0.294680
27 H23 h4      E     26 25 23      1.084      122.222      -0.013      0.183740
28 C10 cd      M     26 25 23      1.386      104.733      179.986      0.052460
29 H24 h4      E     28 26 25      1.085      126.008      -179.997      0.130680
30 N11 nd      M     28 26 25      1.325      111.679      -0.029      -0.504900
31 C12 cc      M     30 28 26      1.313      105.418      0.040      0.093350
32 H25 h5      E     31 30 28      1.085      127.386      -179.959      0.122500

LOOP
C6      07
C12     N8

IMPROPER
C6      C9      N8      C12
C10     H23     C9      N8
C9      H24     C10     N11
H25     N8      C12     N11

DONE
STOP

```

Table S12. prepi file for test molecule 9.

```

0      0      2

prepi file for test molecule 9
molecule.res
d09 INT 0
CORRECT OMIT DU BEG
0.0000
1 DUMM DU M 0 -1 -2 0.000 .0 .0 .00000
2 DUMM DU M 1 0 -1 1.449 .0 .0 .00000
3 DUMM DU M 2 1 0 1.523 111.21 .0 .00000
4 C14 c3 M 3 2 1 1.540 111.208 -180.000 -0.059940
5 H26 h1 E 4 3 2 1.090 0.000 -90.000 0.066500
6 H27 h1 E 4 3 2 1.090 109.453 -120.008 0.062010
7 H28 h1 E 4 3 2 1.090 109.453 120.008 0.072840
8 N1 n3 M 4 3 2 1.460 109.490 0.000 -0.569960
9 H15 hn E 8 4 3 1.010 109.505 -59.943 0.296280
10 C2 c3 M 8 4 3 1.460 109.490 180.000 0.075380
11 H16 h1 E 10 8 4 1.090 109.453 59.992 0.053950
12 H17 h1 E 10 8 4 1.090 109.453 -59.992 0.051040
13 C3 c3 M 10 8 4 1.500 109.474 -180.000 0.135060
14 07 os E 13 10 8 1.436 109.705 59.998 -0.387240
15 H18 h1 E 13 10 8 1.092 107.677 -60.925 0.024840
16 C4 c3 M 13 10 8 1.535 111.369 175.869 0.189810
17 H13 h1 E 16 13 10 1.089 109.031 133.558 0.041300
18 F19 f E 16 13 10 1.380 114.456 13.685 -0.220420
19 C5 c3 M 16 13 10 1.514 103.695 -111.946 0.204240
20 H20 h1 E 19 16 13 1.090 113.314 -151.801 0.039070
21 F21 f E 19 16 13 1.380 110.438 87.062 -0.223530
22 C6 c3 M 19 16 13 1.522 102.231 -30.070 0.280140
23 H22 h2 E 22 19 16 1.093 112.129 -75.233 0.036700
24 N8 na M 22 19 16 1.460 112.802 162.332 0.036270
25 C9 cc M 24 22 19 1.370 127.533 -82.906 -0.330430
26 H23 h4 E 25 24 22 1.084 122.222 -0.013 0.210320
27 C10 cd M 25 24 22 1.386 104.733 179.986 0.072230
28 H24 h4 E 27 25 24 1.085 126.008 -179.997 0.124510
29 N11 nd M 27 25 24 1.325 111.679 -0.029 -0.509160
30 C12 cc M 29 27 25 1.313 105.418 0.040 0.119520
31 H25 h5 E 30 29 27 1.085 127.386 -179.959 0.108670

LOOP
C6 07
C12 N8

IMPROPER
C6 C9 N8 C12
C10 H23 C9 N8
C9 H24 C10 N11
H25 N8 C12 N11

DONE
STOP

```

Table S13. prepi file for test molecule 10.

```

0      0      2

prepi file for test molecule 10
molecule.res
d10 INT 0
CORRECT OMIT DU BEG
0.0000
1 DUMM DU M 0 -1 -2 0.000 .0 .0 .00000
2 DUMM DU M 1 0 -1 1.449 .0 .0 .00000
3 DUMM DU M 2 1 0 1.523 111.21 .0 .00000
4 C14 c3 M 3 2 1 1.540 111.208 -180.000 0.025610
5 H26 h1 E 4 3 2 1.090 0.000 -90.000 0.047200
6 H27 h1 E 4 3 2 1.090 109.453 -120.008 0.050770
7 H28 h1 E 4 3 2 1.090 109.453 120.008 0.054110
8 N1 n3 M 4 3 2 1.460 109.490 0.000 -0.633110
9 H15 hn E 8 4 3 1.010 109.505 -59.943 0.314600
10 C2 c3 M 8 4 3 1.460 109.490 180.000 -0.021980
11 H16 h1 E 10 8 4 1.090 109.453 59.992 0.075500
12 H17 h1 E 10 8 4 1.090 109.453 -59.992 0.072890
13 C3 c3 M 10 8 4 1.500 109.474 -180.000 0.315180
14 07 os E 13 10 8 1.436 109.705 59.998 -0.414600
15 H18 h1 E 13 10 8 1.092 107.677 -60.925 -0.007110
16 C4 c3 M 13 10 8 1.535 111.369 175.869 0.194420
17 H13 h1 E 16 13 10 1.089 109.031 133.558 0.043660
18 019 oh S 16 13 10 1.409 114.435 13.689 -0.607030
19 H29 ho E 18 16 13 0.960 109.498 -179.972 0.429550
20 C5 c3 M 16 13 10 1.514 103.695 -111.946 -0.144230
21 H20 h1 E 20 16 13 1.090 113.314 -151.801 0.143910
22 021 oh S 20 16 13 1.410 110.427 87.045 -0.512400
23 H30 ho E 22 20 16 0.961 109.504 179.965 0.403240
24 C6 c3 M 20 16 13 1.522 102.231 -30.070 0.207080
25 H22 h2 E 24 20 16 1.093 112.129 -75.233 0.071380
26 N8 na M 24 20 16 1.460 112.802 162.332 0.150680
27 C9 cc M 26 24 20 1.370 127.533 -82.906 -0.417430
28 H23 h4 E 27 26 24 1.084 122.222 -0.013 0.221360
29 C10 cd M 27 26 24 1.386 104.733 179.986 0.154080
30 H24 h4 E 29 27 26 1.085 126.008 -179.997 0.106540
31 N11 nd M 29 27 26 1.325 111.679 -0.029 -0.528210
32 C12 cc M 31 29 27 1.313 105.418 0.040 0.056480
33 H25 h5 E 32 31 29 1.085 127.386 -179.959 0.147860

LOOP
C6 07
C12 N8

IMPROPER
C6 C9 N8 C12
C10 H23 C9 N8
C9 H24 C10 N11
H25 N8 C12 N11

DONE
STOP

```

**Table S14.** prepi file for test molecule 11.

```

0      0      2

prepi file for test molecule 11
molecule.res
d11 INT 0
CORRECT OMIT DU BEG
0.0000
1 DUMM DU M 0 -1 -2 0.000 .0 .0 .00000
2 DUMM DU M 1 0 -1 1.449 .0 .0 .00000
3 DUMM DU M 2 1 0 1.523 111.21 .0 .00000
4 C14 c3 M 3 2 1 1.540 111.208 -180.000 -0.151860
5 H26 h1 E 4 3 2 1.090 0.000 -90.000 0.085290
6 H27 h1 E 4 3 2 1.090 109.453 -120.008 0.090040
7 H28 h1 E 4 3 2 1.090 109.453 120.008 0.091780
8 N1 n3 M 4 3 2 1.460 109.490 0.000 -0.561760
9 H15 hn E 8 4 3 1.010 109.505 -59.943 0.308260
10 C2 c3 M 8 4 3 1.460 109.490 180.000 0.138900
11 H16 h1 E 10 8 4 1.090 109.453 59.992 0.028320
12 H17 h1 E 10 8 4 1.090 109.453 -59.992 0.046620
13 C3 c3 M 10 8 4 1.500 109.474 -180.000 0.078310
14 O7 os E 13 10 8 1.436 109.705 59.998 -0.402780
15 H18 h1 E 13 10 8 1.092 107.677 -60.925 0.052390
16 C4 c3 M 13 10 8 1.535 111.369 175.869 0.252330
17 F13 f E 16 13 10 1.379 109.041 133.545 -0.230430
18 H19 h1 E 16 13 10 1.091 114.423 13.693 0.021510
19 C5 c3 M 16 13 10 1.514 103.695 -111.946 0.116160
20 F20 f E 19 16 13 1.380 113.304 -151.791 -0.225680
21 H21 h1 E 19 16 13 1.091 110.440 87.060 0.069560
22 C6 c3 M 19 16 13 1.522 102.231 -30.070 0.350840
23 H22 h2 E 22 19 16 1.093 112.129 -75.233 0.056810
24 N8 na M 22 19 16 1.460 112.802 162.332 -0.084750
25 C9 cc M 24 22 19 1.370 127.533 -82.906 -0.243200
26 H23 h4 E 25 24 22 1.084 122.222 -0.013 0.178340
27 C10 cd M 25 24 22 1.386 104.733 179.986 0.068060
28 H24 h4 E 27 25 24 1.085 126.008 -179.997 0.125340
29 N11 nd M 27 25 24 1.325 111.679 -0.029 -0.522610
30 C12 cc M 29 27 25 1.313 105.418 0.040 0.151480
31 H25 h5 E 30 29 27 1.085 127.386 -179.959 0.112730

LOOP
C6 O7
C12 N8

IMPROPER
C6 C9 N8 C12
C10 H23 C9 N8
C9 H24 C10 N11
H25 N8 C12 N11

DONE
STOP

```

Table S15. prepi file for test molecule 12.

```

0      0      2

prepi file for test molecule 12
molecule.res
d12 INT 0
CORRECT OMIT DU BEG
0.0000
1 DUMM DU M 0 -1 -2 0.000 .0 .0 .00000
2 DUMM DU M 1 0 -1 1.449 .0 .0 .00000
3 DUMM DU M 2 1 0 1.523 111.21 .0 .00000
4 C14 c3 M 3 2 1 1.540 111.208 -180.000 0.066610
5 H26 h1 E 4 3 2 1.090 0.000 -90.000 0.028030
6 H27 h1 E 4 3 2 1.090 109.453 -120.008 0.035940
7 H28 h1 E 4 3 2 1.090 109.453 120.008 0.036770
8 N1 n3 M 4 3 2 1.460 109.490 0.000 -0.626490
9 H15 hn E 8 4 3 1.010 109.505 -59.943 0.310220
10 C2 c3 M 8 4 3 1.460 109.490 180.000 0.112810
11 H16 h1 E 10 8 4 1.090 109.453 59.992 0.029630
12 H17 h1 E 10 8 4 1.090 109.453 -59.992 0.041470
13 C3 c3 M 10 8 4 1.500 109.474 -180.000 0.136600
14 07 os E 13 10 8 1.436 109.705 59.998 -0.384260
15 H18 h1 E 13 10 8 1.092 107.677 -60.925 0.050900
16 C4 c3 M 13 10 8 1.535 111.369 175.869 0.200380
17 013 oh S 16 13 10 1.410 109.046 133.545 -0.578810
18 H29 ho E 17 16 13 0.960 109.464 -179.983 0.387920
19 H19 h1 E 16 13 10 1.091 114.423 13.693 0.020720
20 C5 c3 M 16 13 10 1.514 103.695 -111.946 0.242270
21 020 oh S 20 16 13 1.410 113.305 -151.801 -0.589780
22 H30 ho E 21 20 16 0.961 109.496 179.992 0.398720
23 H21 h1 E 20 16 13 1.091 110.440 87.060 0.006540
24 C6 c3 M 20 16 13 1.522 102.231 -30.070 0.129050
25 H22 h2 E 24 20 16 1.093 112.129 -75.233 0.107570
26 N8 na M 24 20 16 1.460 112.802 162.332 -0.005390
27 C9 cc M 26 24 20 1.370 127.533 -82.906 -0.255030
28 H23 h4 E 27 26 24 1.084 122.222 -0.013 0.179380
29 C10 cd M 27 26 24 1.386 104.733 179.986 0.050800
30 H24 h4 E 29 27 26 1.085 126.008 -179.997 0.124870
31 N11 nd M 29 27 26 1.325 111.679 -0.029 -0.524770
32 C12 cc M 31 29 27 1.313 105.418 0.040 0.169500
33 H25 h5 E 32 31 29 1.085 127.386 -179.959 0.097830

LOOP
C6 07
C12 N8

IMPROPER
C6 C9 N8 C12
C10 H23 C9 N8
C9 H24 C10 N11
H25 N8 C12 N11

DONE
STOP

```

**Table S16.** prepi file for test molecule **13**.

```

0      0      2

prepi file for test molecule 13
molecule.res
d13      INT      0
CORRECT      OMIT DU      BEG
0.0000
1  DUMM DU M 0 -1 -2 0.000 .0 .0 .00000
2  DUMM DU M 1 0 -1 1.449 .0 .0 .00000
3  DUMM DU M 2 1 0 1.523 111.21 .0 .00000
4  C14 c3 M 3 2 1 1.540 111.208 -180.000 0.026440
5  H26 h1 E 4 3 2 1.090 0.000 -90.000 0.046790
6  H27 h1 E 4 3 2 1.090 109.453 -120.008 0.038420
7  H28 h1 E 4 3 2 1.090 109.453 120.008 0.049730
8  N1 n3 M 4 3 2 1.460 109.490 0.000 -0.585900
9  H15 hn E 8 4 3 1.010 109.505 -59.943 0.309580
10 C2 c3 M 8 4 3 1.460 109.490 180.000 -0.008460
11 H16 h1 E 10 8 4 1.090 109.453 59.992 0.080910
12 H17 h1 E 10 8 4 1.090 109.453 -59.992 0.086320
13 C3 c3 M 10 8 4 1.500 109.474 -180.000 0.083850
14 07 os E 13 10 8 1.436 109.705 59.998 -0.380950
15 H18 h1 E 13 10 8 1.092 107.677 -60.925 0.064310
16 C4 c3 M 13 10 8 1.535 111.369 175.869 0.209630
17 H13 h1 E 16 13 10 1.089 109.031 133.558 0.057350
18 F19 f E 16 13 10 1.380 114.456 13.685 -0.233750
19 C5 c3 M 16 13 10 1.514 103.695 -111.946 0.128850
20 F20 f E 19 16 13 1.380 113.304 -151.791 -0.235080
21 H21 h1 E 19 16 13 1.091 110.440 87.060 0.084210
22 C6 c3 M 19 16 13 1.522 102.231 -30.070 0.330850
23 H22 h2 E 22 19 16 1.093 112.129 -75.233 0.061070
24 N8 na M 22 19 16 1.460 112.802 162.332 -0.097220
25 C9 cc M 24 22 19 1.370 127.533 -82.906 -0.269370
26 H23 h4 E 25 24 22 1.084 122.222 -0.013 0.185470
27 C10 cd M 25 24 22 1.386 104.733 179.986 0.100310
28 H24 h4 E 27 25 24 1.085 126.008 -179.997 0.113520
29 N11 nd M 27 25 24 1.325 111.679 -0.029 -0.527990
30 C12 cc M 29 27 25 1.313 105.418 0.040 0.182080
31 H25 h5 E 30 29 27 1.085 127.386 -179.959 0.099030

LOOP
C6 07
C12 N8

IMPROPER
C6 C9 N8 C12
C10 H23 C9 N8
C9 H24 C10 N11
H25 N8 C12 N11

DONE
STOP

```

Table S17. prepi file for test molecule 14.

```

0      0      2

prepi file for test molecule 14
molecule.res
d14      INT      0
CORRECT      OMIT DU      BEG
0.0000
1  DUMM DU M 0 -1 -2 0.000 .0 .0 .00000
2  DUMM DU M 1 0 -1 1.449 .0 .0 .00000
3  DUMM DU M 2 1 0 1.523 111.21 .0 .00000
4  C14 c3 M 3 2 1 1.540 111.208 -180.000 0.059170
5  H26 h1 E 4 3 2 1.090 0.000 -90.000 0.040410
6  H27 h1 E 4 3 2 1.090 109.453 -120.008 0.033560
7  H28 h1 E 4 3 2 1.090 109.453 120.008 0.051290
8  N1 n3 M 4 3 2 1.460 109.490 0.000 -0.661440
9  H15 hn E 8 4 3 1.010 109.505 -59.943 0.339740
10 C2 c3 M 8 4 3 1.460 109.490 180.000 0.023680
11 H16 h1 E 10 8 4 1.090 109.453 59.992 0.088790
12 H17 h1 E 10 8 4 1.090 109.453 -59.992 0.068110
13 C3 c3 M 10 8 4 1.500 109.474 -180.000 0.034180
14 07 os E 13 10 8 1.436 109.705 59.998 -0.394840
15 H18 h1 E 13 10 8 1.092 107.677 -60.925 0.080940
16 C4 c3 M 13 10 8 1.535 111.369 175.869 0.281900
17 H13 h1 E 16 13 10 1.089 109.031 133.558 0.027500
18 019 oh S 16 13 10 1.409 114.435 13.689 -0.610830
19 H29 ho E 18 16 13 0.960 109.498 -179.972 0.409480
20 C5 c3 M 16 13 10 1.514 103.695 -111.946 -0.002500
21 020 oh S 20 16 13 1.410 113.305 -151.801 -0.549490
22 H30 ho E 21 20 16 0.961 109.496 179.992 0.386420
23 H21 h1 E 20 16 13 1.091 110.440 87.060 0.086390
24 C6 c3 M 20 16 13 1.522 102.231 -30.070 0.379370
25 H22 h2 E 24 20 16 1.093 112.129 -75.233 0.036810
26 N8 na M 24 20 16 1.460 112.802 162.332 -0.050190
27 C9 cc M 26 24 20 1.370 127.533 -82.906 -0.230000
28 H23 h4 E 27 26 24 1.084 122.222 -0.013 0.159560
29 C10 cd M 27 26 24 1.386 104.733 179.986 0.056930
30 H24 h4 E 29 27 26 1.085 126.008 -179.997 0.123410
31 N11 nd M 29 27 26 1.325 111.679 -0.029 -0.504360
32 C12 cc M 31 29 27 1.313 105.418 0.040 0.114200
33 H25 h5 E 32 31 29 1.085 127.386 -179.959 0.121810

LOOP
C6 07
C12 N8

IMPROPER
C6 C9 N8 C12
C10 H23 C9 N8
C9 H24 C10 N11
H25 N8 C12 N11

DONE
STOP

```

**Table S18.** prepi file for test molecule **15**.

```

0      0      2

prepi file for test molecule 15
molecule.res
d15      INT      0
CORRECT      OMIT DU      BEG
0.0000
1  DUMM DU M 0 -1 -2 0.000 .0 .0 .00000
2  DUMM DU M 1 0 -1 1.449 .0 .0 .00000
3  DUMM DU M 2 1 0 1.523 111.21 .0 .00000
4  C14 c3 M 3 2 1 1.540 111.208 -180.000 -0.027640
5  H26 h1 E 4 3 2 1.090 0.000 -90.000 0.060770
6  H27 h1 E 4 3 2 1.090 109.453 -120.008 0.060060
7  H28 h1 E 4 3 2 1.090 109.453 120.008 0.062480
8  N1 n3 M 4 3 2 1.460 109.490 0.000 -0.572670
9  H15 hn E 8 4 3 1.010 109.505 -59.943 0.305260
10 C2 c3 M 8 4 3 1.460 109.490 180.000 -0.005130
11 H16 h1 E 10 8 4 1.090 109.453 59.992 0.080100
12 H17 h1 E 10 8 4 1.090 109.453 -59.992 0.072340
13 C3 c3 M 10 8 4 1.500 109.474 -180.000 0.112140
14 07 os E 13 10 8 1.436 109.705 59.998 -0.410480
15 H18 h1 E 13 10 8 1.092 107.677 -60.925 0.051440
16 C4 c3 M 13 10 8 1.535 111.369 175.869 0.222050
17 F13 f E 16 13 10 1.379 109.041 133.545 -0.230590
18 H19 h1 E 16 13 10 1.091 114.423 13.693 0.036780
19 C5 c3 M 16 13 10 1.514 103.695 -111.946 0.126170
20 H20 h1 E 19 16 13 1.090 113.314 -151.801 0.053230
21 F21 f E 19 16 13 1.380 110.438 87.062 -0.213210
22 C6 c3 M 19 16 13 1.522 102.231 -30.070 0.465440
23 H22 h2 E 22 19 16 1.093 112.129 -75.233 0.012420
24 N8 na M 22 19 16 1.460 112.802 162.332 -0.170820
25 C9 cc M 24 22 19 1.370 127.533 -82.906 -0.242700
26 H23 h4 E 25 24 22 1.084 122.222 -0.013 0.180370
27 C10 cd M 25 24 22 1.386 104.733 179.986 0.073380
28 H24 h4 E 27 25 24 1.085 126.008 -179.997 0.122380
29 N11 nd M 27 25 24 1.325 111.679 -0.029 -0.532340
30 C12 cc M 29 27 25 1.313 105.418 0.040 0.212030
31 H25 h5 E 30 29 27 1.085 127.386 -179.959 0.096740

LOOP
C6 07
C12 N8

IMPROPER
C6 C9 N8 C12
C10 H23 C9 N8
C9 H24 C10 N11
H25 N8 C12 N11

DONE
STOP

```



Table S19. prepi file for test molecule 16.

```

0      0      2

prepi file for test molecule 16
molecule.res
d16      INT      0
CORRECT      OMIT DU      BEG
0.0000
1  DUMM DU      M      0 -1 -2      0.000      .0      .0      .00000
2  DUMM DU      M      1 0 -1      1.449      .0      .0      .00000
3  DUMM DU      M      2 1 0      1.523      111.21      .0      .00000
4  C14 c3      M      3 2 1      1.540      111.208      -180.000      -0.069830
5  H26 h1      E      4 3 2      1.090      0.000      -90.000      0.062290
6  H27 h1      E      4 3 2      1.090      109.453      -120.008      0.066880
7  H28 h1      E      4 3 2      1.090      109.453      120.008      0.077290
8  N1 n3      M      4 3 2      1.460      109.490      0.000      -0.555310
9  H15 hn      E      8 4 3      1.010      109.505      -59.943      0.302370
10 C2 c3      M      8 4 3      1.460      109.490      180.000      0.041570
11 H16 h1      E     10 8 4      1.090      109.453      59.992      0.058590
12 H17 h1      E     10 8 4      1.090      109.453      -59.992      0.068600
13 C3 c3      M     10 8 4      1.500      109.474      -180.000      0.037220
14 07 os      E     13 10 8      1.436      109.705      59.998      -0.349400
15 H18 h1      E     13 10 8      1.092      107.677      -60.925      0.076470
16 C4 c3      M     13 10 8      1.535      111.369      175.869      0.263810
17 013 oh      S     16 13 10      1.410      109.046      133.545      -0.578150
18 H29 ho      E     17 16 13      0.960      109.464      -179.983      0.377640
19 H19 h1      E     16 13 10      1.091      114.423      13.693      0.035720
20 C5 c3      M     16 13 10      1.514      103.695      -111.946      -0.018440
21 H20 h1      E     20 16 13      1.090      113.314      -151.801      0.096860
22 021 oh      S     20 16 13      1.410      110.427      87.045      -0.540050
23 H30 ho      E     22 20 16      0.961      109.504      179.965      0.410840
24 C6 c3      M     20 16 13      1.522      102.231      -30.070      0.290690
25 H22 h2      E     24 20 16      1.093      112.129      -75.233      0.069080
26 N8 na      M     24 20 16      1.460      112.802      162.332      -0.129630
27 C9 cc      M     26 24 20      1.370      127.533      -82.906      -0.239930
28 H23 h4      E     27 26 24      1.084      122.222      -0.013      0.179280
29 C10 cd      M     27 26 24      1.386      104.733      179.986      0.088250
30 H24 h4      E     29 27 26      1.085      126.008      -179.997      0.115540
31 N11 nd      M     29 27 26      1.325      111.679      -0.029      -0.541120
32 C12 cc      M     31 29 27      1.313      105.418      0.040      0.201080
33 H25 h5      E     32 31 29      1.085      127.386      -179.959      0.101790

LOOP
C6      07
C12     N8

IMPROPER
C6      C9      N8      C12
C10     H23     C9      N8
C9      H24     C10     N11
H25     N8      C12     N11

DONE
STOP

```

Table S20. prepi file for test molecule 17.

```

0      0      2

prepi file for test molecule 17
molecule.res
d17  INT  0
CORRECT  OMIT DU  BEG
0.0000
1  DUMM  DU  M  0 -1 -2  0.000  .0  .0  .00000
2  DUMM  DU  M  1 0 -1  1.449  .0  .0  .00000
3  DUMM  DU  M  2 1 0  1.523 111.21  .0  .00000
4  C14  c3  M  3 2 1  1.540 111.208 -180.000 0.032290
5  H26  h1  E  4 3 2  1.090  0.000 -90.000 0.042730
6  H27  h1  E  4 3 2  1.090 109.453 -120.008 0.045920
7  H28  h1  E  4 3 2  1.090 109.453 120.008 0.050050
8  N1   n3  M  4 3 2  1.460 109.490  0.000 -0.626970
9  H15  hn  E  8 4 3  1.010 109.505 -59.943 0.319150
10 C2   c3  M  8 4 3  1.460 109.490 180.000 0.030070
11 H16  h1  E 10 8 4  1.090 109.453  59.992 0.065840
12 H17  h1  E 10 8 4  1.090 109.453 -59.992 0.079790
13 C3   c3  M 10 8 4  1.500 109.474 -180.000 0.078150
14 07   os  E 13 10 8  1.436 109.705  59.998 -0.376390
15 H18  h1  E 13 10 8  1.092 107.677 -60.925 0.057880
16 C4   c3  M 13 10 8  1.535 111.369 175.869 0.308170
17 H13  h1  E 16 13 10 1.089 109.031 133.558 0.000790
18 F19  f  E 16 13 10 1.380 114.456  13.685 -0.243150
19 C5   c3  M 16 13 10 1.514 103.695 -111.946 0.107400
20 H20  h1  E 19 16 13 1.090 113.314 -151.801 0.042750
21 021  oh  S 19 16 13 1.410 110.427  87.045 -0.554470
22 H29  ho  E 21 19 16 0.961 109.504 179.965 0.397910
23 C6   c3  M 19 16 13 1.522 102.231 -30.070 0.267330
24 H22  h2  E 23 19 16 1.093 112.129 -75.233 0.040080
25 N8   na  M 23 19 16 1.460 112.802 162.332 0.029250
26 C9   cc  M 25 23 19 1.370 127.533 -82.906 -0.365280
27 H23  h4  E 26 25 23 1.084 122.222 -0.013 0.213180
28 C10  cd  M 26 25 23 1.386 104.733 179.986 0.139880
29 H24  h4  E 28 26 25 1.085 126.008 -179.997 0.109830
30 N11  nd  M 28 26 25 1.325 111.679 -0.029 -0.551270
31 C12  cc  M 30 28 26 1.313 105.418  0.040 0.141750
32 H25  h5  E 31 30 28 1.085 127.386 -179.959 0.117340

LOOP
C6  07
C12 N8

IMPROPER
C6  C9  N8  C12
C10 H23 C9  N8
C9  H24 C10 N11
H25 N8  C12 N11

DONE
STOP

```

**Table S21.** prepi file for test molecule 18.

```

0      0      2

prepi file for test molecule 18
molecule.res
d18      INT      0
CORRECT      OMIT DU      BEG
0.0000
1  DUMM DU M 0 -1 -2 0.000 .0 .0 .00000
2  DUMM DU M 1 0 -1 1.449 .0 .0 .00000
3  DUMM DU M 2 1 0 1.523 111.21 .0 .00000
4  C14 c3 M 3 2 1 1.540 111.208 -180.000 -0.041080
5  H26 h1 E 4 3 2 1.090 0.000 -90.000 0.067200
6  H27 h1 E 4 3 2 1.090 109.453 -120.008 0.056440
7  H28 h1 E 4 3 2 1.090 109.453 120.008 0.070860
8  N1 n3 M 4 3 2 1.460 109.490 0.000 -0.598610
9  H15 hn E 8 4 3 1.010 109.505 -59.943 0.318860
10 C2 c3 M 8 4 3 1.460 109.490 180.000 0.002610
11 H16 h1 E 10 8 4 1.090 109.453 59.992 0.072740
12 H17 h1 E 10 8 4 1.090 109.453 -59.992 0.072210
13 C3 c3 M 10 8 4 1.500 109.474 -180.000 0.252750
14 07 os E 13 10 8 1.436 109.705 59.998 -0.442600
15 H18 h1 E 13 10 8 1.092 107.677 -60.925 -0.007980
16 C4 c3 M 13 10 8 1.535 111.369 175.869 0.121320
17 H13 h1 E 16 13 10 1.089 109.031 133.558 0.038840
18 019 oh S 16 13 10 1.409 114.435 13.689 -0.602330
19 H29 ho E 18 16 13 0.960 109.498 -179.972 0.420060
20 C5 c3 M 16 13 10 1.514 103.695 -111.946 0.257530
21 H20 h1 E 20 16 13 1.090 113.314 -151.801 0.006070
22 F21 f E 20 16 13 1.380 110.438 87.062 -0.238040
23 C6 c3 M 20 16 13 1.522 102.231 -30.070 0.399140
24 H22 h2 E 23 20 16 1.093 112.129 -75.233 0.020130
25 N8 na M 23 20 16 1.460 112.802 162.332 -0.147810
26 C9 cc M 25 23 20 1.370 127.533 -82.906 -0.227610
27 H23 h4 E 26 25 23 1.084 122.222 -0.013 0.176680
28 C10 cd M 26 25 23 1.386 104.733 179.986 0.047320
29 H24 h4 E 28 26 25 1.085 126.008 -179.997 0.127130
30 N11 nd M 28 26 25 1.325 111.679 -0.029 -0.529330
31 C12 cc M 30 28 26 1.313 105.418 0.040 0.223370
32 H25 h5 E 31 30 28 1.085 127.386 -179.959 0.084130

LOOP
C6 07
C12 N8

IMPROPER
C6 C9 N8 C12
C10 H23 C9 N8
C9 H24 C10 N11
H25 N8 C12 N11

DONE
STOP

```

Table S22. prepi file for test molecule 19.

```

0      0      2

prepi file for test molecule 19
molecule.res
d19      INT      0
CORRECT      OMIT DU      BEG
0.0000
1  DUMM DU      M      0 -1 -2      0.000      .0      .0      .00000
2  DUMM DU      M      1 0 -1      1.449      .0      .0      .00000
3  DUMM DU      M      2 1 0      1.523      111.21      .0      .00000
4  C14 c3      M      3 2 1      1.540      111.208      -180.000      -0.098620
5  H26 h1      E      4 3 2      1.090      0.000      -90.000      0.072560
6  H27 h1      E      4 3 2      1.090      109.453      -120.008      0.077570
7  H28 h1      E      4 3 2      1.090      109.453      120.008      0.080250
8  N1  n3      M      4 3 2      1.460      109.490      0.000      -0.568160
9  H15 hn      E      8 4 3      1.010      109.505      -59.943      0.311270
10 C2  c3      M      8 4 3      1.460      109.490      180.000      0.041280
11 H16 h1      E     10 8 4      1.090      109.453      59.992      0.044960
12 H17 h1      E     10 8 4      1.090      109.453      -59.992      0.067350
13 C3  c3      M     10 8 4      1.500      109.474      -180.000      0.180230
14 07  os      E     13 10 8      1.436      109.705      59.998      -0.372750
15 H18 h1      E     13 10 8      1.092      107.677      -60.925      0.025630
16 C4  c3      M     13 10 8      1.535      111.369      175.869      0.255960
17 F13 f      E     16 13 10      1.379      109.041      133.545      -0.230040
18 H19 h1      E     16 13 10      1.091      114.423      13.693      0.012770
19 C5  c3      M     16 13 10      1.514      103.695      -111.946      0.065320
20 020 oh      S     19 16 13      1.410      113.305      -151.801      -0.533510
21 H29 ho      E     20 19 16      0.961      109.496      179.992      0.386950
22 H21 h1      E     19 16 13      1.091      110.440      87.060      0.086480
23 C6  c3      M     19 16 13      1.522      102.231      -30.070      0.128820
24 H22 h2      E     23 19 16      1.093      112.129      -75.233      0.124500
25 N8  na      M     23 19 16      1.460      112.802      162.332      0.019780
26 C9  cc      M     25 23 19      1.370      127.533      -82.906      -0.321120
27 H23 h4      E     26 25 23      1.084      122.222      -0.013      0.197030
28 C10 cd      M     26 25 23      1.386      104.733      179.986      0.094920
29 H24 h4      E     28 26 25      1.085      126.008      -179.997      0.117740
30 N11 nd      M     28 26 25      1.325      111.679      -0.029      -0.523300
31 C12 cc      M     30 28 26      1.313      105.418      0.040      0.151500
32 H25 h5      E     31 30 28      1.085      127.386      -179.959      0.104630

LOOP
C6      07
C12     N8

IMPROPER
C6      C9      N8      C12
C10     H23     C9      N8
C9      H24     C10     N11
H25     N8      C12     N11

DONE
STOP

```

Table S23. prepi file for test molecule 20.

```

0      0      2

prepi file for test molecule 20
molecule.res
d20  INT  0
CORRECT  OMIT DU  BEG
0.0000
1  DUMM  DU  M  0 -1 -2  0.000  .0  .0  .00000
2  DUMM  DU  M  1 0 -1  1.449  .0  .0  .00000
3  DUMM  DU  M  2 1 0  1.523 111.21  .0  .00000
4  C14  c3  M  3 2 1  1.540 111.208 -180.000 -0.024990
5  H26  h1  E  4 3 2  1.090  0.000 -90.000 0.059100
6  H27  h1  E  4 3 2  1.090 109.453 -120.008 0.055090
7  H28  h1  E  4 3 2  1.090 109.453 120.008 0.061110
8  N1   n3  M  4 3 2  1.460 109.490  0.000 -0.573530
9  H15  hn  E  8 4 3  1.010 109.505 -59.943 0.311200
10 C2   c3  M  8 4 3  1.460 109.490 180.000 -0.008210
11 H16  h1  E 10 8 4  1.090 109.453  59.992 0.076970
12 H17  h1  E 10 8 4  1.090 109.453 -59.992 0.075620
13 C3   c3  M 10 8 4  1.500 109.474 -180.000 0.094110
14 O7   os  E 13 10 8  1.436 109.705  59.998 -0.344560
15 H18  h1  E 13 10 8  1.092 107.677 -60.925 0.064140
16 C4   c3  M 13 10 8  1.535 111.369 175.869 0.162310
17 O13  oh  S 16 13 10  1.410 109.046 133.545 -0.541810
18 H29  ho  E 17 16 13  0.960 109.464 -179.983 0.379370
19 H19  h1  E 16 13 10  1.091 114.423  13.693 0.045970
20 C5   c3  M 16 13 10  1.514 103.695 -111.946 0.183920
21 F20  f   E 20 16 13  1.380 113.304 -151.791 -0.223740
22 H21  h1  E 20 16 13  1.091 110.440  87.060 0.046600
23 C6   c3  M 20 16 13  1.522 102.231 -30.070 0.164570
24 H22  h2  E 23 20 16  1.093 112.129 -75.233 0.097240
25 N8   na  M 23 20 16  1.460 112.802 162.332 0.037240
26 C9   cc  M 25 23 20  1.370 127.533 -82.906 -0.325790
27 H23  h4  E 26 25 23  1.084 122.222 -0.013 0.195390
28 C10  cd  M 26 25 23  1.386 104.733 179.986 0.111640
29 H24  h4  E 28 26 25  1.085 126.008 -179.997 0.111200
30 N11  nd  M 28 26 25  1.325 111.679 -0.029 -0.522210
31 C12  cc  M 30 28 26  1.313 105.418  0.040 0.110300
32 H25  h5  E 31 30 28  1.085 127.386 -179.959 0.121750

LOOP
C6  07
C12 N8

IMPROPER
C6  C9  N8  C12
C10 H23 C9  N8
C9  H24 C10 N11
H25 N8  C12 N11

DONE
STOP

```

**Table S24.** prepi file for test molecule **21**.

```

0      0      2

prepi file for test molecule 21
molecule.res
d21      INT      0
CORRECT      OMIT DU      BEG
0.0000
1  DUMM DU M 0 -1 -2 0.000 .0 .0 .00000
2  DUMM DU M 1 0 -1 1.449 .0 .0 .00000
3  DUMM DU M 2 1 0 1.523 111.21 .0 .00000
4  C14 c3 M 3 2 1 1.540 111.208 -180.000 -0.053740
5  H26 h1 E 4 3 2 1.090 0.000 -90.000 0.065380
6  H27 h1 E 4 3 2 1.090 109.453 -120.008 0.061910
7  H28 h1 E 4 3 2 1.090 109.453 120.008 0.070440
8  N1 n3 M 4 3 2 1.460 109.490 0.000 -0.566820
9  H15 hn E 8 4 3 1.010 109.505 -59.943 0.311590
10 C2 c3 M 8 4 3 1.460 109.490 180.000 -0.039580
11 H16 h1 E 10 8 4 1.090 109.453 59.992 0.077430
12 H17 h1 E 10 8 4 1.090 109.453 -59.992 0.085160
13 C3 c3 M 10 8 4 1.500 109.474 -180.000 0.184330
14 07 os E 13 10 8 1.436 109.705 59.998 -0.385120
15 H18 h1 E 13 10 8 1.092 107.677 -60.925 0.039380
16 C4 c3 M 13 10 8 1.535 111.369 175.869 0.184760
17 H13 h1 E 16 13 10 1.089 109.031 133.558 0.064200
18 F19 f E 16 13 10 1.380 114.456 13.685 -0.232690
19 C5 c3 M 16 13 10 1.514 103.695 -111.946 0.004860
20 020 oh S 19 16 13 1.410 113.305 -151.801 -0.521200
21 H29 ho E 20 19 16 0.961 109.496 179.992 0.380450
22 H21 h1 E 19 16 13 1.091 110.440 87.060 0.116060
23 C6 c3 M 19 16 13 1.522 102.231 -30.070 0.279390
24 H22 h2 E 23 19 16 1.093 112.129 -75.233 0.067810
25 N8 na M 23 19 16 1.460 112.802 162.332 -0.056770
26 C9 cc M 25 23 19 1.370 127.533 -82.906 -0.280480
27 H23 h4 E 26 25 23 1.084 122.222 -0.013 0.193090
28 C10 cd M 26 25 23 1.386 104.733 179.986 0.068750
29 H24 h4 E 28 26 25 1.085 126.008 -179.997 0.126030
30 N11 nd M 28 26 25 1.325 111.679 -0.029 -0.531790
31 C12 cc M 30 28 26 1.313 105.418 0.040 0.179020
32 H25 h5 E 31 30 28 1.085 127.386 -179.959 0.108150

LOOP
C6 07
C12 N8

IMPROPER
C6 C9 N8 C12
C10 H23 C9 N8
C9 H24 C10 N11
H25 N8 C12 N11

DONE
STOP

```

Table S25. prepi file for test molecule 22.

```

0      0      2

prepi file for test molecule 22
molecule.res
d22      INT      0
CORRECT      OMIT DU      BEG
0.0000
1  DUMM DU      M      0 -1 -2      0.000      .0      .0      .00000
2  DUMM DU      M      1 0 -1      1.449      .0      .0      .00000
3  DUMM DU      M      2 1 0      1.523      111.21      .0      .00000
4  C14 c3      M      3 2 1      1.540      111.208      -180.000      -0.018020
5  H26 h1      E      4 3 2      1.090      0.000      -90.000      0.059800
6  H27 h1      E      4 3 2      1.090      109.453      -120.008      0.060760
7  H28 h1      E      4 3 2      1.090      109.453      120.008      0.062640
8  N1 n3      M      4 3 2      1.460      109.490      0.000      -0.632340
9  H15 hn      E      8 4 3      1.010      109.505      -59.943      0.316860
10 C2 c3      M      8 4 3      1.460      109.490      180.000      0.056220
11 H16 h1      E     10 8 4      1.090      109.453      59.992      0.055580
12 H17 h1      E     10 8 4      1.090      109.453      -59.992      0.059410
13 C3 c3      M     10 8 4      1.500      109.474      -180.000      0.236910
14 07 os      E     13 10 8      1.436      109.705      59.998      -0.408790
15 H18 h1      E     13 10 8      1.092      107.677      -60.925      0.003040
16 C4 c3      M     13 10 8      1.535      111.369      175.869      0.166520
17 H13 h1      E     16 13 10      1.089      109.031      133.558      0.031130
18 019 oh      S     16 13 10      1.409      114.435      13.689      -0.600600
19 H29 ho      E     18 16 13      0.960      109.498      -179.972      0.402130
20 C5 c3      M     16 13 10      1.514      103.695      -111.946      0.227530
21 F20 f      E     20 16 13      1.380      113.304      -151.791      -0.253740
22 H21 h1      E     20 16 13      1.091      110.440      87.060      0.037790
23 C6 c3      M     20 16 13      1.522      102.231      -30.070      0.286240
24 H22 h2      E     23 20 16      1.093      112.129      -75.233      0.058660
25 N8 na      M     23 20 16      1.460      112.802      162.332      -0.090390
26 C9 cc      M     25 23 20      1.370      127.533      -82.906      -0.222120
27 H23 h4      E     26 25 23      1.084      122.222      -0.013      0.171410
28 C10 cd      M     26 25 23      1.386      104.733      179.986      0.065750
29 H24 h4      E     28 26 25      1.085      126.008      -179.997      0.118210
30 N11 nd      M     28 26 25      1.325      111.679      -0.029      -0.524270
31 C12 cc      M     30 28 26      1.313      105.418      0.040      0.165950
32 H25 h5      E     31 30 28      1.085      127.386      -179.959      0.107730

LOOP
C6      07
C12     N8

IMPROPER
C6      C9      N8      C12
C10     H23     C9      N8
C9      H24     C10     N11
H25     N8      C12     N11

DONE
STOP

```

Table S26. prepi file for test molecule 23.

```

0      0      2

prepi file for test molecule 23
molecule.res
d23      INT      0
CORRECT      OMIT DU      BEG
0.0000
1  DUMM DU M 0 -1 -2 0.000 .0 .0 .00000
2  DUMM DU M 1 0 -1 1.449 .0 .0 .00000
3  DUMM DU M 2 1 0 1.523 111.21 .0 .00000
4  C14 c3 M 3 2 1 1.540 111.208 -180.000 0.025640
5  H26 h1 E 4 3 2 1.090 0.000 -90.000 0.040870
6  H27 h1 E 4 3 2 1.090 109.453 -120.008 0.046220
7  H28 h1 E 4 3 2 1.090 109.453 120.008 0.055500
8  N1 n3 M 4 3 2 1.460 109.490 0.000 -0.609000
9  H15 hn E 8 4 3 1.010 109.505 -59.943 0.307900
10 C2 c3 M 8 4 3 1.460 109.490 180.000 0.064400
11 H16 h1 E 10 8 4 1.090 109.453 59.992 0.038480
12 H17 h1 E 10 8 4 1.090 109.453 -59.992 0.057870
13 C3 c3 M 10 8 4 1.500 109.474 -180.000 0.143610
14 07 os E 13 10 8 1.436 109.705 59.998 -0.380390
15 H18 h1 E 13 10 8 1.092 107.677 -60.925 0.038270
16 C4 c3 M 13 10 8 1.535 111.369 175.869 0.338720
17 F13 f E 16 13 10 1.379 109.041 133.545 -0.273350
18 H19 h1 E 16 13 10 1.091 114.423 13.693 0.029850
19 C5 c3 M 16 13 10 1.514 103.695 -111.946 -0.034370
20 H20 h1 E 19 16 13 1.090 113.314 -151.801 0.099480
21 021 oh S 19 16 13 1.410 110.427 87.045 -0.553710
22 H29 ho E 21 19 16 0.961 109.504 179.965 0.414420
23 C6 c3 M 19 16 13 1.522 102.231 -30.070 0.238710
24 H22 h2 E 23 19 16 1.093 112.129 -75.233 0.070440
25 N8 na M 23 19 16 1.460 112.802 162.332 -0.032620
26 C9 cc M 25 23 19 1.370 127.533 -82.906 -0.226600
27 H23 h4 E 26 25 23 1.084 122.222 -0.013 0.169960
28 C10 cd M 26 25 23 1.386 104.733 179.986 0.056060
29 H24 h4 E 28 26 25 1.085 126.008 -179.997 0.123590
30 N11 nd M 28 26 25 1.325 111.679 -0.029 -0.519890
31 C12 cc M 30 28 26 1.313 105.418 0.040 0.151750
32 H25 h5 E 31 30 28 1.085 127.386 -179.959 0.118190

LOOP
C6 07
C12 N8

IMPROPER
C6 C9 N8 C12
C10 H23 C9 N8
C9 H24 C10 N11
H25 N8 C12 N11

DONE
STOP

```



Table S27. prepi file for test molecule 24.

```

0      0      2

prepi file for test molecule 24
molecule.res
d24      INT      0
CORRECT      OMIT DU      BEG
0.0000
1  DUMM DU M 0 -1 -2 0.000 .0 .0 .00000
2  DUMM DU M 1 0 -1 1.449 .0 .0 .00000
3  DUMM DU M 2 1 0 1.523 111.21 .0 .00000
4  C14 c3 M 3 2 1 1.540 111.208 -180.000 -0.038480
5  H26 h1 E 4 3 2 1.090 0.000 -90.000 0.059410
6  H27 h1 E 4 3 2 1.090 109.453 -120.008 0.063560
7  H28 h1 E 4 3 2 1.090 109.453 120.008 0.057950
8  N1 n3 M 4 3 2 1.460 109.490 0.000 -0.570780
9  H15 hn E 8 4 3 1.010 109.505 -59.943 0.296900
10 C2 c3 M 8 4 3 1.460 109.490 180.000 0.093700
11 H16 h1 E 10 8 4 1.090 109.453 59.992 0.041300
12 H17 h1 E 10 8 4 1.090 109.453 -59.992 0.042380
13 C3 c3 M 10 8 4 1.500 109.474 -180.000 0.109590
14 07 os E 13 10 8 1.436 109.705 59.998 -0.382410
15 H18 h1 E 13 10 8 1.092 107.677 -60.925 0.051090
16 C4 c3 M 13 10 8 1.535 111.369 175.869 0.149070
17 013 oh S 16 13 10 1.410 109.046 133.545 -0.555110
18 H29 ho E 17 16 13 0.960 109.464 -179.983 0.383930
19 H19 h1 E 16 13 10 1.091 114.423 13.693 0.072950
20 C5 c3 M 16 13 10 1.514 103.695 -111.946 0.025540
21 H20 h1 E 20 16 13 1.090 113.314 -151.801 0.093680
22 F21 f E 20 16 13 1.380 110.438 87.062 -0.188880
23 C6 c3 M 20 16 13 1.522 102.231 -30.070 0.370790
24 H22 h2 E 23 20 16 1.093 112.129 -75.233 0.045220
25 N8 na M 23 20 16 1.460 112.802 162.332 -0.126130
26 C9 cc M 25 23 20 1.370 127.533 -82.906 -0.234750
27 H23 h4 E 26 25 23 1.084 122.222 -0.013 0.181040
28 C10 cd M 26 25 23 1.386 104.733 179.986 0.049070
29 H24 h4 E 28 26 25 1.085 126.008 -179.997 0.132920
30 N11 nd M 28 26 25 1.325 111.679 -0.029 -0.537190
31 C12 cc M 30 28 26 1.313 105.418 0.040 0.216600
32 H25 h5 E 31 30 28 1.085 127.386 -179.959 0.097040

LOOP
C6 07
C12 N8

IMPROPER
C6 C9 N8 C12
C10 H23 C9 N8
C9 H24 C10 N11
H25 N8 C12 N11

DONE
STOP

```
